# Supplementary material
Source: Springer Nature journal article supplement (https://www.springermedizin.de/resource/supplementary/12992_2011_148_MOESM2_ESM.pdf/9616648)
Supplement: MOESM2 [file 9616648]

## **I. Communicable Conditions, Women's Health and Childhood Diseases**

- Diarrhea/Dysentery, Gastritis/peptic ulcer, worm infestation, Amoebiasis, Hepatitis/Jaundice
- Malaria, Mumps, Diphtheria, Whooping Cough, Fever of Unknown Origin
- Tetanus
- Filariasis
- Diseases of the skin,
- Gynecological disorders
- Under-nutrition, anemia
- Sexually transmitted diseases
- Respiratory (including ear/nose/throat) ailments for ages < 15 years
- Tuberculosis

## **II. Non-Communicable Conditions**

- Heart disease, hypertension
- Bronchial asthma
- Respiratory (including ear/nose/throat) ailments for ages > 15 years
- Disorders of joints and bones
- Diseases of the kidney/Urinary system
- Neurological disorders
- Psychiatric disorders
- Diabetes
- Cancers and other tumors
- Accidents/injuries/burns/fractures/poisoning

## **III. Other Conditions/Disabilities**

- Goiter
- Eye ailments (cataract, glaucoma, conjunctivitis)
- Diseases of the mouth, teeth and gum
- *Disabilities*: locomotor, visual, speech hearing
- Other undiagnosed ailments

*Note:* We classified the age-category for respiratory ailments to get around the problem of confusing childhood conditions with conditions such as COPD.
